# Supplementary material for: Serum metabolomic profiling facilitates the non-invasive identification of metabolic biomarkers associated with the onset and progression of non-small cell lung cancer
Source: PubMed Central journal article supplement (PMC4914330; doi:10.18632/oncotarget.7354), 2016-02-12
Supplement: oncotarget-07-12904-s001.pdf [file oncotarget-07-12904-s001.pdf]

# Serum metabolomic profiling facilitates the non-invasive identification of metabolic biomarkers associated with the onset and progression of non-small cell lung cancer

## Supplementary Material

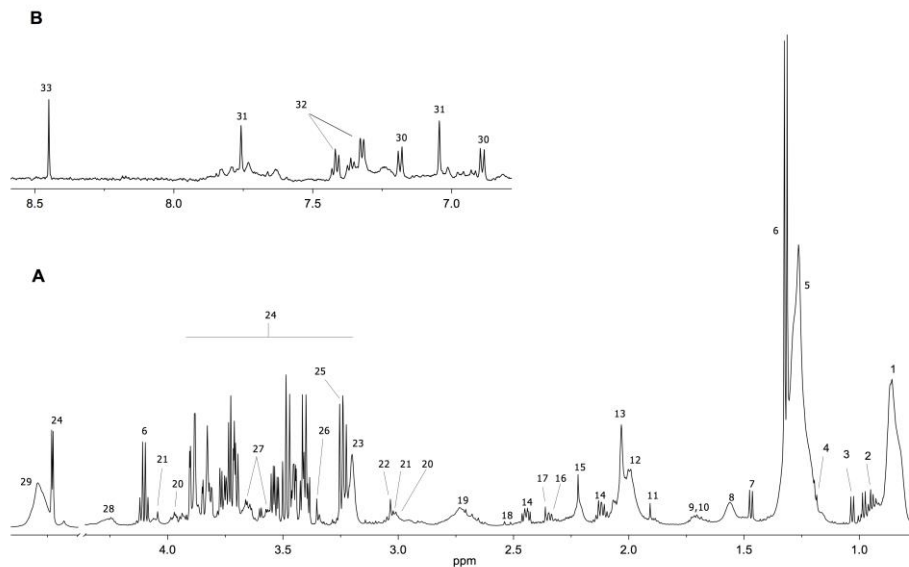

**Supp. Figure 1.** Assignment of the <sup>1</sup>H-NMR signals of a representative 600 MHz one-dimensional Carr–Purcell–Meiboom–Gill (1D-CPMG) <sup>1</sup>H-NMR spectrum of an early-stage NSCLC patient serum sample measured at 310K. **A**, full spectrum (d=5.25–0.75 ppm) and **B**, magnification of aromatic region (d=8.60–6.75 ppm). Peak assignments: 1, lipids (–CH<sub>3</sub>) (mainly LDL/VLDL); 2, leucine/isoleucine; 3, valine; 4, 3-hydroxybutyrate; 5, lipids (CH<sub>2</sub>)<sub>n</sub> (mainly LDL/VLDL); 6, lactate; 7, alanine; 8, adipic acid; 9, lysine; 10, arginine; 11, acetate; 12, lipids (CH<sub>2</sub>–C=C); 13, NAC (acetyl signals from glycoproteins); 14, glutamine; 15, lipids (CH<sub>2</sub>–CO); 16, glutamate; 17, pyruvate; 18, citrate; 19, lipids (CH=CH–CH<sub>2</sub>–CH=CH–); 20, creatine; 21, creatinine; 22, acetate; 23, choline; 24, glucose; 25, trimethylamine N-oxide; 26, methanol; 27, glycerol; 28, threonine; 29, lipids (–CH=CH–); 30, tyrosine; 31, histidine; 32, phenylalanine; 33, formate.

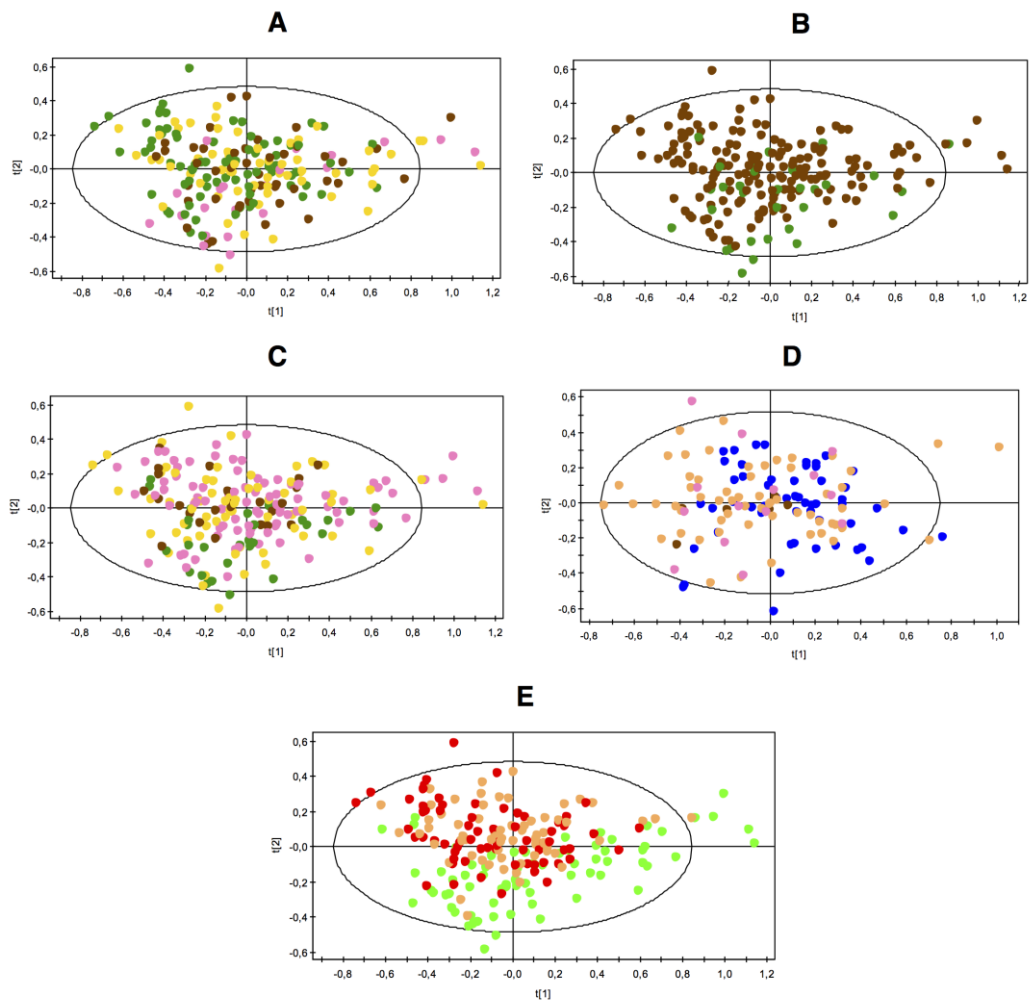

**Supp. Figure 2. Principal Component Analysis (PCA) score plots corresponding to the samples included in the training set. Samples are classified according to: (A) Age:  $\color{magenta}\bullet$ : <45;  $\color{brown}\bullet$ : 45-55;  $\color{yellow}\bullet$ : 55-65;  $\color{green}\bullet$ : >65; (B) Gender:  $\color{brown}\bullet$ : male;  $\color{green}\bullet$ : female; (C) Smoking habits:  $\color{green}\bullet$ : Non-smoker;  $\color{yellow}\bullet$ : Ex-smoker;  $\color{magenta}\bullet$ : Smoker;  $\color{brown}\bullet$ : Unknown; (D) Histology:  $\color{blue}\bullet$ : Adenocarcinoma;  $\color{yellow}\bullet$ : Squamous-cell carcinoma;  $\color{red}\bullet$ : Large-cell carcinoma;  $\color{magenta}\bullet$ : Other or unspecified; and (E) Group:  $\color{orange}\bullet$ : ES/NSCLC;  $\color{red}\bullet$ : AS/NSCLC;  $\color{green}\bullet$ : Healthy individuals.**

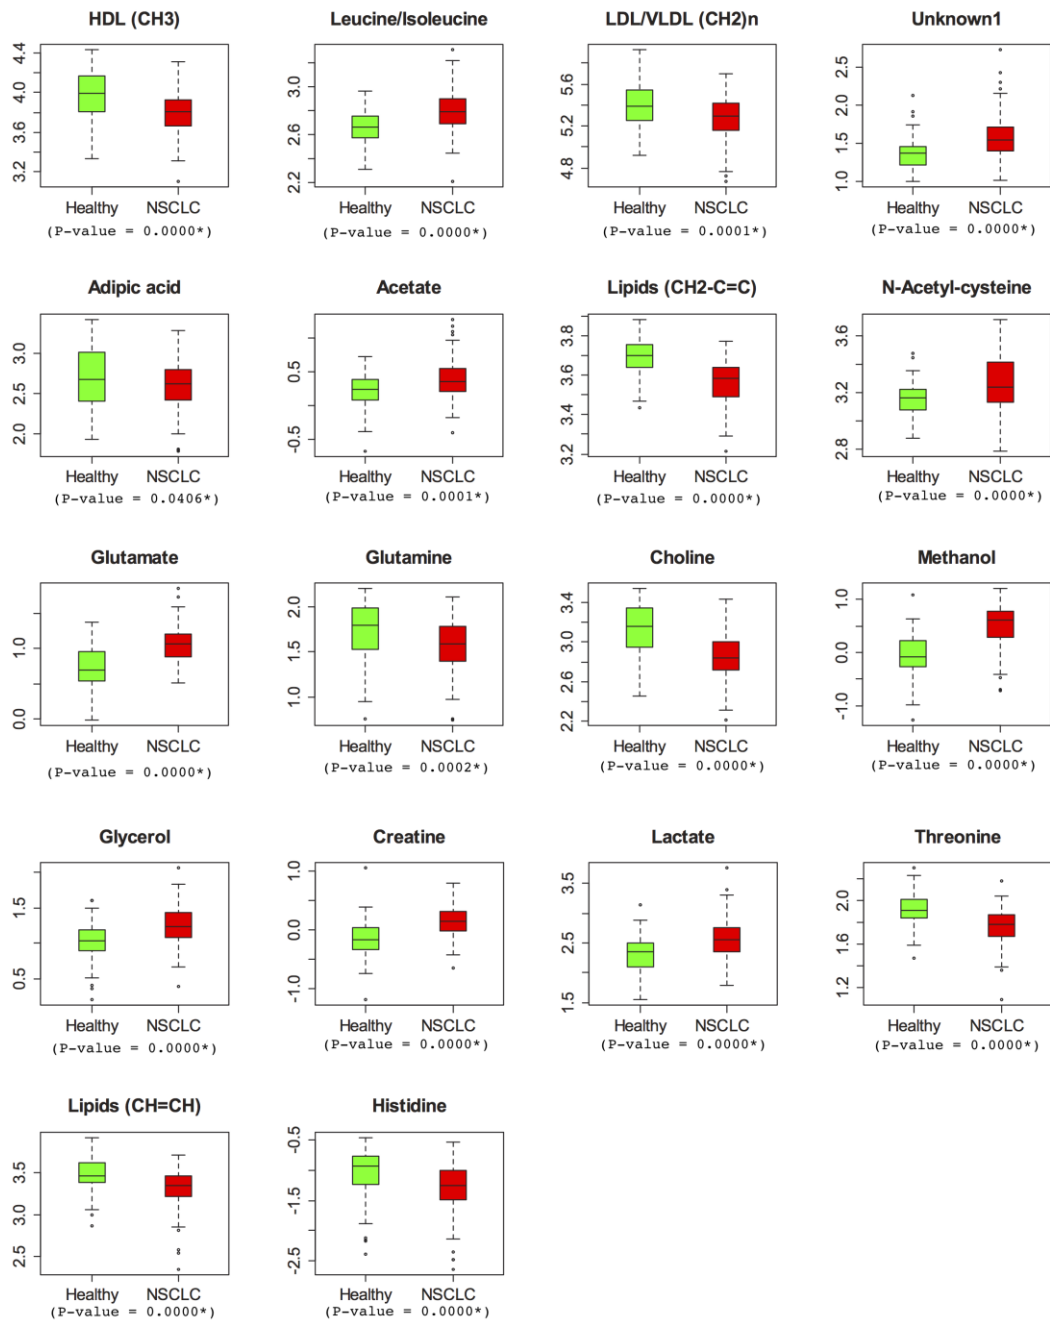

**A**

**Supp. Figure 3A. Boxplot (log scale) for the most significant metabolites found in the comparison between healthy individuals and NSCLC patients.** For each box, the central line is the median, the edges of the box are the upper and lower quartiles, the whiskers extend the box by a further  $\pm 1.5$  interquartile range (IQR), and outliers are plotted as individual points. Statistically significant *P*-values (*P*-value<0.05) are indicated with asteriks (\*).

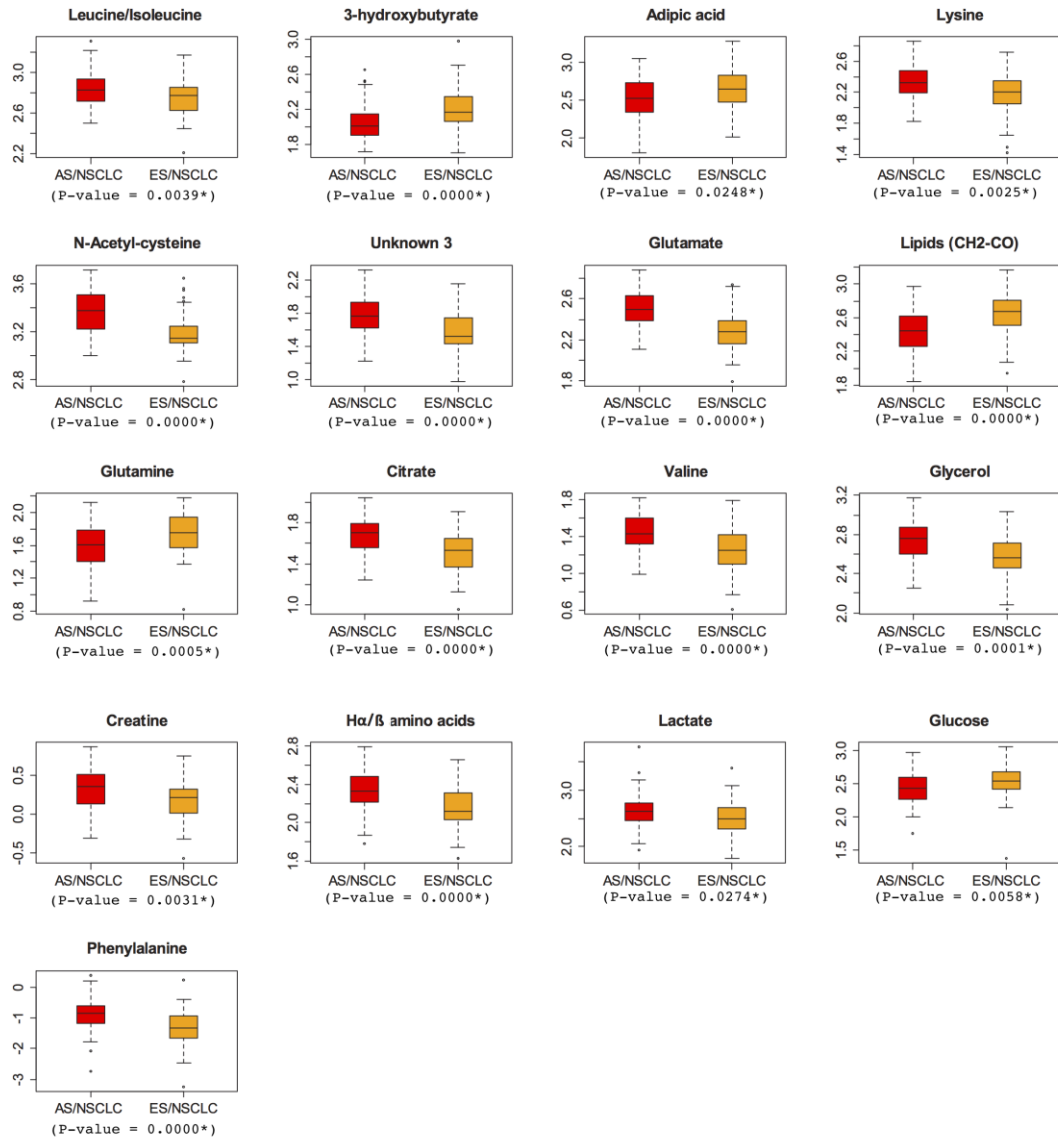

## B

**Supp. Figure 3B. Boxplot (log scale) for the most significant metabolites found in the comparison between early-stage (ES) and advanced-stage (AS) NSCLC patients.** For each box, the central line is the median, the edges of the box are the upper and lower quartiles, the whiskers extend the box by a further  $\pm 1.5$  interquartile range (IQR), and outliers are plotted as individual points. Statistically significant *P*-values ( $P$ -value < 0.05) are indicated with asteriks (\*).

|                                                           | AUC  | 95% CI <sup>a</sup> |       | Cut-off point | Sensitivity | Specificity |
|-----------------------------------------------------------|------|---------------------|-------|---------------|-------------|-------------|
|                                                           |      | Lower               | Upper |               |             |             |
| <b>Methanol</b>                                           | 0,82 | 0,74                | 0,90  | 1,55          | 68%         | 90%         |
| <b>Lactate</b>                                            | 0,79 | 0,72                | 0,88  | 10,71         | 70%         | 82%         |
| <b>Glutamine</b>                                          | 0,65 | 0,56                | 0,75  | 5,63          | 75%         | 55%         |
| <b>Choline -N(CH<sub>3</sub>)<sub>3</sub><sup>+</sup></b> | 0,82 | 0,76                | 0,90  | 20,30         | 82%         | 73%         |
| <b>Threonine</b>                                          | 0,75 | 0,67                | 0,84  | 5,71          | 80%         | 67%         |

<sup>a</sup>Asymptotic 95% confidence interval, lower and upper bound

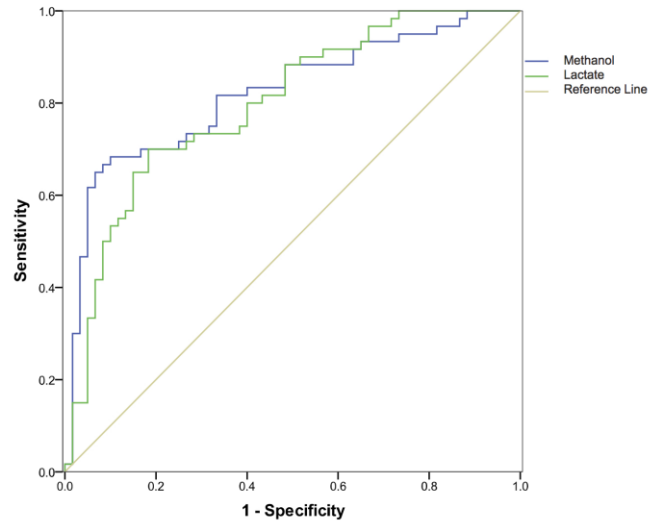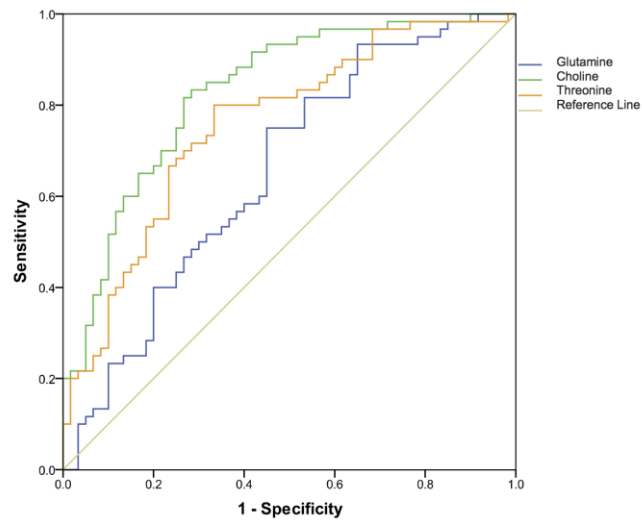

**Supp. Figure 4. Internal validation of the logistic regression equation.**

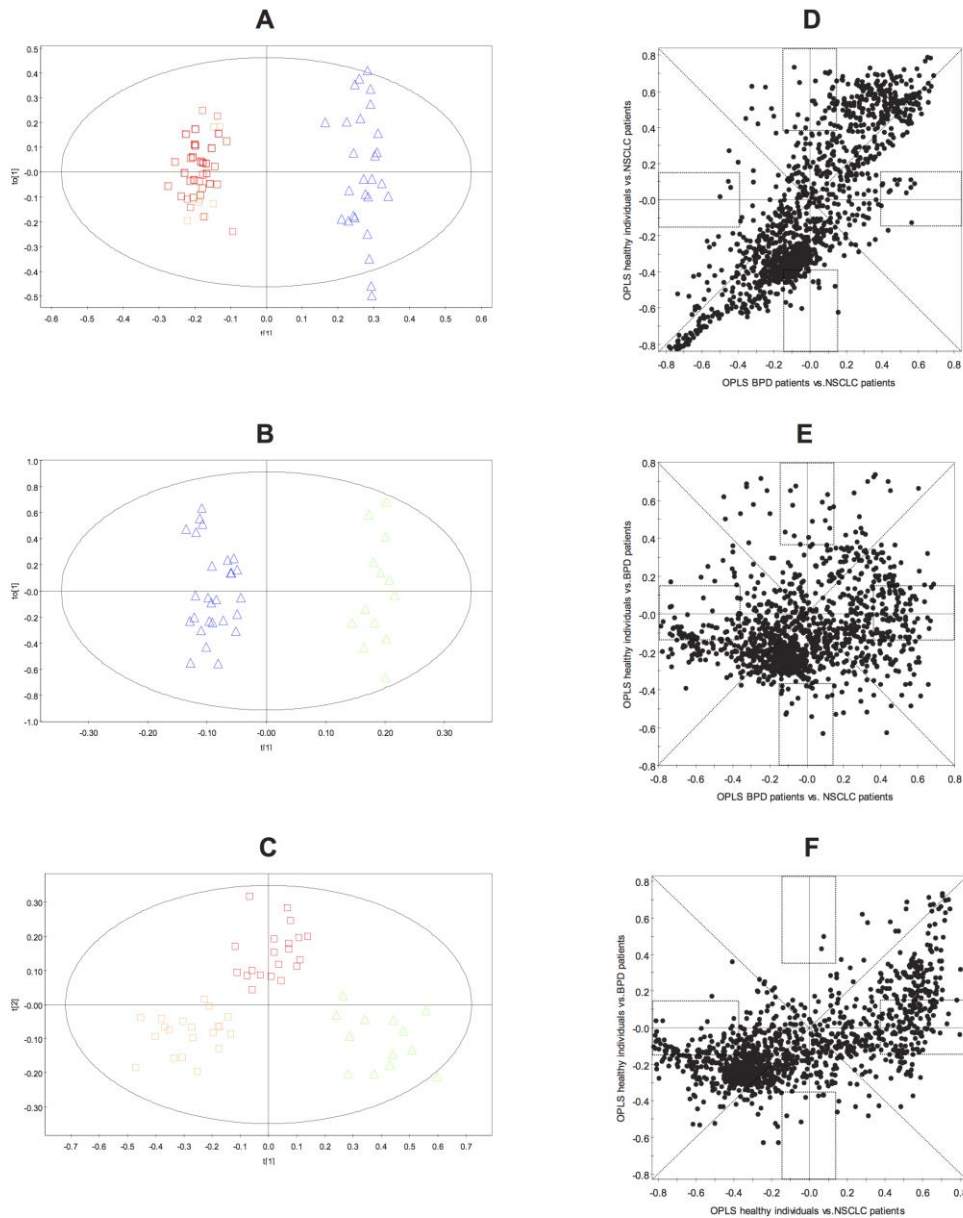

**Supp. Figure 5. Multivariate modelling resulting from the analysis of serum  $^1\text{H}$ -NMR spectra from the validation set.** OPLS-DA score plots for the comparisons between: (A) BPD ( $\Delta$ ) vs. NSCLC patients (early-stage and advanced-stage,  $\square$  and  $\square$ , respectively); (B) healthy individuals ( $\Delta$ ) vs. BPD patients ( $\Delta$ ), and (C) healthy individuals ( $\Delta$ ) vs. NSCLC patients (early-stage and advanced-stage,  $\square$  and  $\square$ , respectively). SUS-plots derived from the OPLS-DA models between: (D) BPD vs. NSCLC patients (*model A, horizontal axis*) and healthy individuals vs.

NSCLC patients (*model C, vertical axis*); **(E)** BPD vs. NSCLC patients (*model A, horizontal axis*) and healthy individuals vs. BPD patients (*model B, vertical axis*) and **(F)** Healthy individuals vs. NSCLC patients (*model C, horizontal axis*) and healthy individuals vs. BPD patients (*model B, vertical axis*). Rectangles indicate unique biomarkers for each model.
